# Supplementary material for: Extremely Uniform Bat Assemblages across Different Forest Habitats, Dominated by Single, Hyperabundant Generalist Species
Source: Preprints.org preprint supplement (doi:10.20944/preprints202312.0909.v1), 2023-12-12
Supplement: Supplementary file 1 [file supplementary]

## Sheet: database
forest or group of forests	habitat	Mm	Mbc	Mn	Mms/Malc	Mbr	Md	Mds	Vm	En	Es	Ppip/Ppyg	Pn	Nn	Nl	Pa	Pas	Bb	total	references		abbreviation	explanation
Kozienicka F	RS	7	1	0	0	0	61	0	0	1	8	12	6	125	35	1	0	3	260	27		habitat
Kozienicka F	SP	23	22	14	12	2	18	0	0	0	19	0	1	32	25	36	0	0	204	27		RS	rivers and streams
Białowieża Primeval F	RS	0	0	9	4	0	125	0	37	21	2	48	40	166	78	11	0	11	552	58		SP	small ponds
Brodnicki LP	RS	0	0	0	0	0	115	0	0	0	0	5	5	10	0	6	0	0	141	94		L	lakes, large fishponds and lagoons
Iława Lakeland LP	RS	0	0	0	0	0	126	4	0	0	7	10	23	17	1	5	0	0	193	95		FR	forest roads and interior of tree stands
Meteoryt Morasko NR	FR	1	0	0	0	0	2	0	0	0	28	0	0	37	0	1	0	1	70	96		species
Mierzeja Wiślana LP	FR	0	0	5	0	0	8	0	0	0	9	29	29	49	0	1	0	0	130	97		Mm	Myotis myotis
Południoworoztoczański LP	RS	0	1	0	2	1	7	0	1	0	7	0	0	10	10	1	0	0	40	98		Mbc	M. bechsteinii
Południoworoztoczański LP	SP	1	1	0	0	0	2	0	0	1	0	0	0	3	6	1	0	0	15	98		Mn	M. nattereri
Południoworoztoczański LP	FR	0	0	1	0	0	0	0	0	0	4	0	0	0	0	4	0	0	9	98		Mms/Malc	M. mystacinus/alcathoe
Łuków F	SP	2	0	1	11	0	3	0	5	13	18	2	0	40	9	13	0	5	122	99		Mbr	M. brandtii
Darżlubska F	SP	0	0	2	0	0	9	0	1	0	6	3	13	33	7	5	0	0	79	100		Md	M. daubentonii
Darżlubska F	RS	0	0	1	0	0	261	2	0	0	11	27	17	13	2	32	0	0	366	100, 101		Mds	M. dasycneme
Bukowa Gora NR	SP	3	2	5	1	2	1	0	0	0	0	6	2	1	3	12	0	7	45	102		Vm	Vespertilio murinus
Bukowa Gora NR	FR	0	1	3	1	2	0	0	0	0	0	0	2	0	0	2	0	6	17	102		En	Eptesicus nilssonii
Dylewo Hills LP	SP	1	0	0	0	0	3	0	0	0	0	0	0	0	1	2	0	1	8	103		Es	E. serotinus
Dylewo Hills LP	L	0	0	0	0	0	13	0	0	0	0	0	2	0	0	0	0	0	15	103		Ppip/Ppyg	Pipistrellus pipistrellus/pygmaeus
Dylewo Hills LP	FR	0	0	0	0	0	2	0	0	0	0	0	0	0	0	3	0	2	7	103		Pn	P. nathusii
Słupia Valley LP	RS	0	0	6	0	0	60	0	0	0	3	8	2	11	0	6	0	0	96	104		Nn	Nyctalus noctula
Płońsk Upland	FR	3	0	11	2	6	11	0	0	0	94	0	1	54	8	120	2	88	400	105		Nl	N. leisleri
Janowskie Forests LP	FR	0	7	8	6	2	1	0	0	0	1	0	0	1	0	4	1	7	38	106		Pa	Plecotus auritus
Janowskie Forests LP	RS	1	8	2	5	4	4	0	0	1	0	2	2	0	1	13	0	1	44	106		Pas	P. austriacus
Strzeleckie Forests LP	FR	0	7	2	4	0	8	0	5	0	32	7	0	71	24	8	1	13	182	107		Bb	Barbastella barbastellus
Zielonka F LP	FR	9	0	15	9	3	60	0	0	0	16	2	7	86	26	30	0	25	288	108		site names
Sobibór Forests	FR	0	4	2	2	0	2	0	0	0	4	1	0	1	2	4	0	0	22	109		F	Forest
Sobibór Forests	RS	0	0	0	1	0	23	0	1	1	2	1	0	16	0	0	0	0	45	109		Fs	Forests
Sobibór Forests	SP	0	0	0	0	0	1	0	0	0	2	1	4	17	4	14	0	0	43	109		NP.	National Park
Wigry NP	L	0	0	0	0	0	134	6	0	0	0	1	2	2	0	2	0	0	147	110, 111		LP	Landscape Park
Wigry NP	RS	0	0	0	0	0	63	1	0	1	6	7	21	11	1	2	0	0	113	110, 111		NR	Nature Reserve
Wigry NP	FR	0	0	0	0	0	0	0	0	0	1	0	0	13	0	0	0	0	14	110, 111
Romincka Forest LP	SP	0	0	0	0	0	5	0	0	1	0	0	0	3	0	0	0	0	9	112
Romincka Forest LP	RS	0	0	0	0	0	11	0	0	0	0	0	1	1	0	0	0	2	15	112
Górznieńsko-Lidzbarski LP	RS	0	0	0	0	0	33	0	0	0	0	1	3	13	5	0	0	0	55	113
Warta and Widawka LP	FR	1	0	3	3	2	1	0	0	0	9	0	0	5	0	12	1	2	39	114
Warta and Widawka LP	RS	1	0	0	0	3	63	0	0	0	0	5	5	3	0	6	0	1	87	114
Rychtalskie F	FR	21	6	12	4	1	1	0	0	0	1	6	0	4	6	14	1	19	96	115
Rychtalskie F	SP	1	1	0	1	0	0	0	0	0	0	0	0	1	0	6	0	0	10	115
Wdzydze LP	RS	0	0	1	0	0	71	21	0	0	1	1	4	16	0	2	0	0	117	116
Lubuskie Lakeland	FR	3	0	4	1	1	33	0	0	0	2	13	8	9	0	2	0	20	96	117
Kaszubski LP	FR	0	0	2	0	0	7	0	0	0	0	0	4	10	0	0	0	0	23	118
Kaszubski LP	RS	0	0	0	0	0	3	0	0	0	2	6	10	2	0	1	0	0	24	119, 120
Białowieża Primeval F	FR	0	0	4	4	0	10	0	0	0	18	25	5	2	0	1	0	142	211	72
Wałeckie Lakeland	L	0	0	2	1	0	137	1	0	0	1	14	12	2	0	3	0	0	173	121
Wałeckie Lakeland	SP	1	0	2	2	0	7	0	0	0	2	0	1	0	0	9	0	0	24	121
Wolin NP	FR	1	0	6	0	0	14	0	0	0	4	132	10	43	0	1	0	0	211	this study
Wolin NP	SP	0	0	11	0	0	0	0	0	0	1	66	4	0	6	13	0	0	101	this study
Wolin NP	L	0	0	3	0	0	20	0	0	0	0	28	2	16	0	3	0	0	72	this study
Wolin NP	RS	0	0	3	0	0	18	0	0	0	0	45	1	0	0	1	0	0	68	this study
Kampinos NP	FR	2	0	9	1	0	10	11	0	0	100	2	0	69	1	21	1	44	271	24
vicinity of Rogów	FR	0	0	0	3	1	1	0	0	0	71	0	2	2	3	13	0	17	113	122
vicinity of Rogów	RS	0	0	0	0	1	23	0	0	0	0	0	0	1	1	0	0	0	26	122
vicinity of Skierniewice	FR	2	0	16	15	4	11	0	0	0	27	1	0	51	1	63	5	24	220	123, 124
vicinity of Skierniewice	RS	0	0	2	1	0	8	0	0	0	0	0	0	0	0	1	0	1	13	123, 124
vicinity of Skierniewice	SP	0	0	6	1	0	1	0	0	0	11	0	0	29	1	12	1	3	65	123, 124
vicinity of Skierniewice	L	0	0	0	0	0	17	0	0	0	0	1	0	0	0	5	0	0	23	123, 124
