# Supplementary material for: Extremely Uniform Bat Assemblages across Different Forest Habitats, Dominated by Single, Hyperabundant Generalist Species
Source: Preprints.org preprint supplement (doi:10.20944/preprints202312.0909.v1), 2023-12-12
Supplement: Supplementary file 3 [file Table S2 Ciechanowski et al.xlsx]

## Sheet: habitats vs methods
mist netting (number of captures)	forest roads and stand interiors	small forest pools	streams	shores of lakes and lagoons	total
Myotis myotis	1	0	0	0	1
Myotis nattereri	6	11	3	3	23
Myotis daubentonii	14	0	18	20	52
Myotis sp.
Eptesicus serotinus	4	1	0	0	5
Pipistrellus pipistrellus	2	1	1	0	4
Pipistrellus pygmaeus	130	65	44	28	267
Pipistrellus nathusii	10	4	1	2	17
Nyctalus noctula	43	0	0	16	59
Nyctalus leisleri	0	6	0	0	6
Plecotus auritus	1	13	1	3	18
total	211	101	68	72	452
ultrasound recording (raw number of echolocation call sequences)	shores of lakes and lagoons	glades	canopy gaps and clearings	total			ultrasound recording (adjusted number of echolocation call sequences)	shores of lakes and lagoons	glades	canopy gaps and clearings	total	detectability coefficient
Myotis myotis	1	0	3	4			Myotis myotis	1.25	0	3.75	5	1.25
Myotis nattereri	0	0	3	3			Myotis nattereri	0	0	5.01	5.01	1.67
Myotis daubentonii							Myotis daubentonii
Myotis sp.	905	3	44	952			Myotis sp.	1511.35	5.01	73.48	1589.84	1.67
Eptesicus serotinus	103	15	38	156			Eptesicus serotinus	64.89	9.45	23.94	98.28	0.63
Pipistrellus pipistrellus	473	9	72	554			Pipistrellus pipistrellus	473	9	72	554	1
Pipistrellus pygmaeus	1617	227	657	2501			Pipistrellus pygmaeus	1617	227	657	2501	1
Pipistrellus nathusii	261	21	178	460			Pipistrellus nathusii	261	21	178	460	1
Pipistrellus sp.	1	4	33	38			Pipistrellus sp.	1	4	33	38	1
Nyctalus noctula	1855	79	54	1988			Nyctalus noctula	463.75	19.75	13.5	497	0.25
Nyctalus leisleri	8	104	8	120			Nyctalus leisleri	2.48	32.24	2.48	37.2	0.31
Plecotus auritus	1	0	3	4			Plecotus auritus	1.25	0	3.75	5	1.25
total	5225	462	1093	6780			total	4396.97	327.45	1065.91	5790.33
